# Supplementary material
Source: PubMed Central journal article supplement (PMC8936668)
Supplement: bmjstel-2020-000711supp001.pdf [file bmjstel-2020-000711supp001.pdf]

## Simulated Patient Scenario Objectives and Descriptions

| Simulation Scenario                       | Learning Objectives                                                                                                                                                                                                                                                                                                                                                             | Description                                                                                                                                                                                                                                                                                                  | Physical Conditions                                                                                                                                                                                                                                                                                                                   |
|-------------------------------------------|---------------------------------------------------------------------------------------------------------------------------------------------------------------------------------------------------------------------------------------------------------------------------------------------------------------------------------------------------------------------------------|--------------------------------------------------------------------------------------------------------------------------------------------------------------------------------------------------------------------------------------------------------------------------------------------------------------|---------------------------------------------------------------------------------------------------------------------------------------------------------------------------------------------------------------------------------------------------------------------------------------------------------------------------------------|
| Care of patient on mechanical ventilation | <ol style="list-style-type: none"> <li>1. Assess the ETT cuff pressure.</li> <li>2. Practice tracheostomy and stoma care</li> <li>3. Practice prone position technique</li> <li>4. Trouble shoot the ventilator alarms</li> <li>5. Change the ETT placement</li> <li>6. Practice ETT suction</li> <li>7. Practice TT suction</li> <li>8. Apply DVT prevention device</li> </ol> | <p>Positive COVID-19, intubated and connected to volume control mode. Sedated with fentanyl. P/F ratio was 55.</p> <p>Prone position ventilation tried once, and saturation improved slightly.</p> <p>After few days, it has been decided to insert tracheotomy tube with mechanical ventilation support</p> | <ul style="list-style-type: none"> <li>• Continuous MV alarm of high peak pressure</li> <li>• BIS =90</li> <li>• CPOT=3</li> <li>• BP=110/70 mm Hg</li> <li>• Temperature=38.6 C</li> <li>• RR=24/min</li> <li>• HR=120/min</li> <li>• O2Sat=94%</li> <li>• FiO2 =80%</li> <li>• ABGs (PH=7.2, Paco2:60, Pao2:60, Hco3:14)</li> </ul> |

| <b>Simulation Scenario</b>                         | <b>Learning Objectives</b>                                                                                                                                                                                                                 | <b>Description</b>                                                                                                                                                                                                                        | <b>Physical Conditions</b>                                                                                                                                                                                                                      |
|----------------------------------------------------|--------------------------------------------------------------------------------------------------------------------------------------------------------------------------------------------------------------------------------------------|-------------------------------------------------------------------------------------------------------------------------------------------------------------------------------------------------------------------------------------------|-------------------------------------------------------------------------------------------------------------------------------------------------------------------------------------------------------------------------------------------------|
| ABCDE assessment and oxygen therapy                | <ol style="list-style-type: none"> <li>1. Perform ABCDE assessment and to manage accordingly</li> <li>2. Decide on the appropriate oxygen therapy based on patient condition</li> </ol>                                                    | <p>Positive COVID-19 on face mask with oxygen 6 L/min</p> <p>After a few minutes, the simulated mannequin and monitor showed short of breath with O2Sat=87%</p>                                                                           | <ul style="list-style-type: none"> <li>• P/F ratio of 200</li> <li>• ABGs (PH=7.3, Paco2:66, Pao2:70, Hco3:30)</li> <li>• Temperature=38C</li> <li>• BP=120/60 mm Hg</li> <li>• RR=26/min</li> <li>• HR=120/min</li> <li>• O2Sat=90%</li> </ul> |
| Care of patient with invasive lines and chest tube | <ol style="list-style-type: none"> <li>1. Perform central line zeroing</li> <li>2. Perform arterial line zeroing</li> <li>3. Perform central line and arterial dressing care</li> <li>4. Perform chest tube monitoring and care</li> </ol> | <p>Positive COVID-19, intubated with pressure control mode, has central line and arterial line monitoring. A chest tube was inserted for hemopneumothorax as complication after central line insertion.</p> <p>On vasopressor support</p> | <ul style="list-style-type: none"> <li>• BP=100/50 mm Hg</li> <li>• Temperature=38.0 C</li> <li>• RR=16/min</li> <li>• HR=130/min</li> <li>• O2Sat=90%</li> <li>• FiO2=60%</li> <li>• CVP=10</li> </ul>                                         |

| Simulation Scenario                       | Learning Objectives                                                                                                                                                                      | Description                                                                                                                                                | Physical Conditions                                                                                                                                                                   |
|-------------------------------------------|------------------------------------------------------------------------------------------------------------------------------------------------------------------------------------------|------------------------------------------------------------------------------------------------------------------------------------------------------------|---------------------------------------------------------------------------------------------------------------------------------------------------------------------------------------|
|                                           |                                                                                                                                                                                          | (Norepinephrine 0.3 mic/kg/min).                                                                                                                           |                                                                                                                                                                                       |
| Oral, eye, NGT, and urinary catheter care | <ol style="list-style-type: none"> <li>1. Perform oral care</li> <li>2. Perform eye care</li> <li>3. Perform urinary catheter care</li> <li>4. Perform NGT insertion and care</li> </ol> | <p>Positive COVID-19, intubated on CPAP mode.</p> <p>NGT was ordered for continuous feeding.</p> <p>Eye, mouth, and urinary catheter care are required</p> | <ul style="list-style-type: none"> <li>• BP=110/70 mm Hg</li> <li>• Temperature=37.8 C</li> <li>• RR=24/min</li> <li>• HR=100/min</li> <li>• O2Sat=95%</li> <li>• FiO2=30%</li> </ul> |

( BIS: Bi Spectral Index), (ABCDE: Airway, Breathing, Circulation, Disability, Exposure), (MV: Mechanical Ventilator), (CPAP: Continuous Positive Airway Pressure), (CPOT: Critical Care Pain Observation Tool), ( Fio2: Fraction of inspired oxygen), ( P/F ratio: Pao2:Fio2),( CVP: Central Venous Pressure).
